# Supplementary material
Source: MDPI journal article supplement (https://www.mdpi.com/2071-1050/11/2/514)
Supplement: s1 [file s1]

**S1 Table.** Distribution of patients against psychological hesitation towards periodic GHE due to diseases discovering and perceivably suitable periodic GHE frequency (Data used for Fig.1).

| "DiscDisease" | "SuitFreq" |       |       |
|---------------|------------|-------|-------|
|               | "m6"       | "m12" | "m18" |
| "yes"         | 990        | 478   | 117   |
| "no"          | 248        | 160   | 75    |

**S2 Table.** Changes in probability of perceivably suitable periodic GHE frequency of those having the last doctor visit 2 years ago (Data used for Fig.2a).

| "DiscDisease" | "SuitFreq" |       |       |
|---------------|------------|-------|-------|
|               | "m6"       | "m12" | "m18" |
| "yes"         | 0.43       | 0.33  | 0.24  |
| "no"          | 0.54       | 0.33  | 0.13  |

**S3 Table.** Changes in probability of perceivably suitable periodic GHE frequency of those who have hesitation towards GHE due to disease identification (Data used for Fig.2b).

| "SuitFreq" | "RecExam" |         |       |           |
|------------|-----------|---------|-------|-----------|
|            | "less12"  | "b1224" | "g24" | "unknown" |
| "m6"       | 0.589     | 0.432   | 0.432 | 0.394     |
| "m12"      | 0.334     | 0.437   | 0.331 | 0.250     |
| "m18"      | 0.077     | 0.131   | 0.237 | 0.356     |
